# Supplementary material for: Ultrasensitive Near‐Infrared Circularly Polarized Light Detection Using 3D Perovskite Embedded with Chiral Plasmonic Nanoparticles
Source: Adv Sci (Weinh). 2022 Jan 2;9(5):2104598. doi: 10.1002/advs.202104598 (PMC8844506; doi:10.1002/advs.202104598)
Supplement: Supplementary file 1 — Supporting Information [file ADVS-9-2104598-s001.pdf]

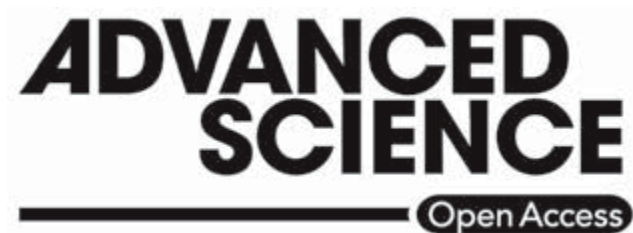

## Supporting Information

for *Adv. Sci.*, DOI: 10.1002/advs.202104598

### **Ultrasensitive Near-Infrared Circularly Polarized Light Detection Using 3D Perovskite Embedded with Chiral Plasmonic Nanoparticles**

*Hongki Kim, Ryeong Myeong Kim, Seok Daniel Namgung, Nam Heon Cho, Jung Bae Son, Kijoon Bang, Mansoo Choi, Seong Keun Kim, Ki Tae Nam, Jong Woo Lee,\* and Joon Hak Oh\**

## Table of Contents

|                                                                                                                                                                                                                          |     |
|--------------------------------------------------------------------------------------------------------------------------------------------------------------------------------------------------------------------------|-----|
| Different drop-casting procedures of AuNP-dispersed aqueous solution on ITO glass (Figure S1) -----                                                                                                                      |     |
| S4                                                                                                                                                                                                                       |     |
| Surface SEM images of perovskite films deposited on ITO/AuNP substrate (Figure S2) -----                                                                                                                                 |     |
| S5                                                                                                                                                                                                                       |     |
| Surface SEM images of perovskite films prepared by mixing perovskite precursor solution and AuNP solution (Figure S3) -----                                                                                              |     |
| -- S6                                                                                                                                                                                                                    |     |
| CD spectra of ITO/AuNPs, ITO/AuNPs/Pb <sub>0.5</sub> Sn <sub>0.5</sub> I <sub>2</sub> , and CsPb <sub>0.5</sub> Sn <sub>0.5</sub> I <sub>3</sub> films (Figure S4) ---                                                   |     |
| S7                                                                                                                                                                                                                       |     |
| CD spectra of AuNPs with various surrounding media deposited on ITO/AuNP substrate and their absorbance (Figure S5) -----                                                                                                |     |
| S8                                                                                                                                                                                                                       |     |
| $n$ , $k$ for each various surrounding media (Figure S6) -----                                                                                                                                                           |     |
| S9                                                                                                                                                                                                                       |     |
| FT-IR spectroscopic analysis of C <sub>60</sub> , PCBM, and bis-PCBM deposited on ITO/AuNPs substrate (Figure S7) -----                                                                                                  |     |
| ----- S10                                                                                                                                                                                                                |     |
| MMSE data recorded in reflection and transmission for ITO/AuNP film with various incident angles (Figure S8) -----                                                                                                       | S11 |
| MMSE data recorded in reflection and transmission for ITO/Cs <sub>0.05</sub> FA <sub>0.5</sub> MA <sub>0.45</sub> Pb <sub>0.5</sub> Sn <sub>0.5</sub> I <sub>3</sub> film with various incident angles (Figure S9) ----- |     |
| -- S12                                                                                                                                                                                                                   |     |

|                                                                                                                                                                                                                                    |       |
|------------------------------------------------------------------------------------------------------------------------------------------------------------------------------------------------------------------------------------|-------|
| MMSE data recorded in reflection and transmission for ITO/AuNP/<br>Cs <sub>0.05</sub> FA <sub>0.5</sub> MA <sub>0.45</sub> Pb <sub>0.5</sub> Sn <sub>0.5</sub> I <sub>3</sub> film with various incident angles (Figure S10) ----- | S13   |
| Cross-sectional SEM image of the whole device (Figure S11) -----                                                                                                                                                                   | S14   |
| Dark currents in CPL detectors with various gold precursor concentrations (Figure S12) ---                                                                                                                                         | S15   |
| Device performance of CPL detectors with various gold precursor concentrations (Figure<br>S13) -----                                                                                                                               | - S16 |
| Surface SEM images of ITO/AuNPs prepared with various gold precursor concentrations<br>(Figure S14) -----                                                                                                                          | S17   |
| Light intensity-dependent device performance (Figure S15) -----                                                                                                                                                                    | S18   |
| Light intensity-dependent device performance (Figure S16) -----                                                                                                                                                                    | S19   |
| Device performance of CPL detector under 650 nm CPL illumination (Figure S17) -----                                                                                                                                                | S20   |
| Device performance of CPL detector using MAPbI <sub>3</sub> as an active layer under 808 nm or 650<br>nm CPL illumination (Figure S18) -----                                                                                       | S21   |
| Surface SEM images of perovskite deposited on ITO/AuNP substrate with various perovskite<br>thicknesses (Figure S19) -----                                                                                                         | S22   |

Normalized fluorescence decay profiles for MAPbI<sub>3</sub> film without AuNPs under 633 nm CPL excitation (Figure S20) -----  
S23

*J-t* curves of flexible CPL detectors under 808 nm CPL illumination at various bending radii (Figure S21) ----- S24

*J-t* curves of flexible CPL detectors under 808 nm CPL illumination after following repetitive bending tests with a fixed bending radius of 2.5 cm (Figure S22) -----  
S25

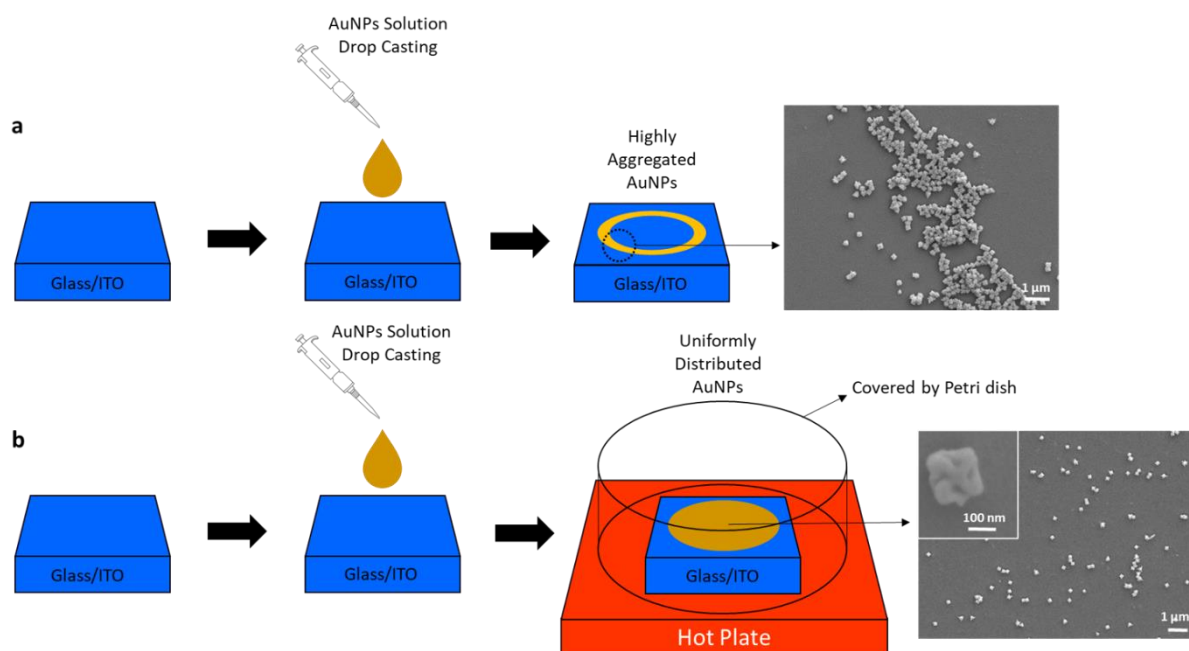

**Figure S1.** Different drop-casting procedures of AuNP-dispersed aqueous solution on ITO glass. (a) The typical drop-casting procedure, where the droplet of AuNP-dispersed aqueous solution was dried under ambient conditions, produced highly aggregated ring-like distribution of AuNPs on ITO substrate. (b) The modified drop-casting procedure, where the substrate was covered by an upside-down petri dish under a constant temperature while drying on a hot plate, produced a homogenous distribution of AuNPs on ITO. Each SEM image shows the morphologies resulting from the drop-casting procedures.

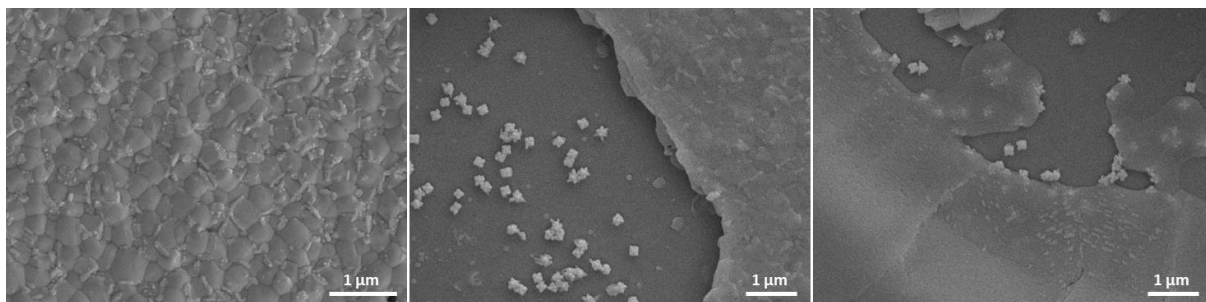

**Figure S2.** Surface SEM images of perovskite films deposited on ITO/AuNP substrate. The ITO/AuNP substrate is fully covered by perovskite (left) and partially covered by perovskite (middle and right).

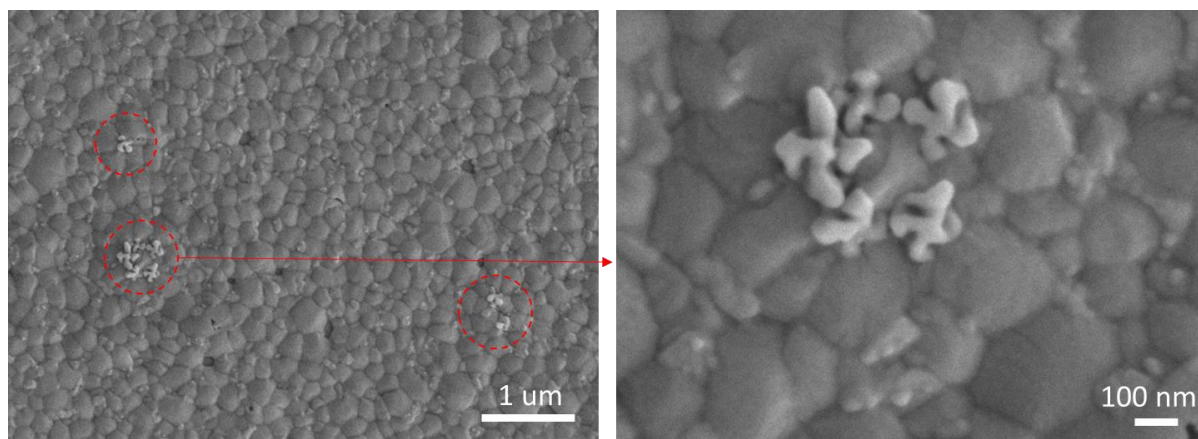

**Figure S3.** Surface SEM images of perovskite films prepared by mixing perovskite precursor solution and AuNP solution, where DMSO replaced the solvent in the AuNP-dispersed aqueous solution.

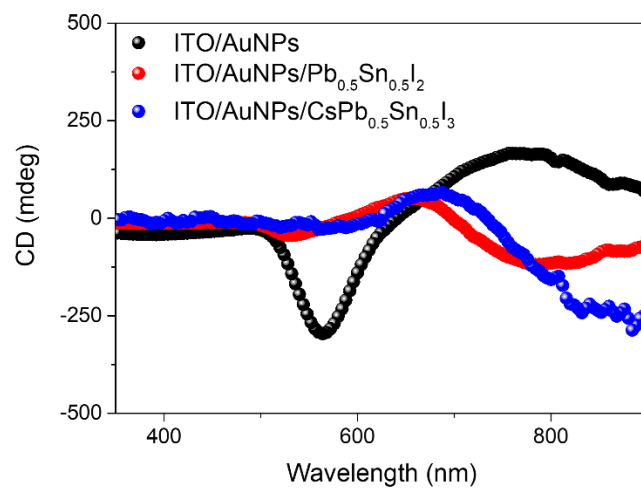

**Figure S4.** CD spectra of ITO/AuNPs, ITO/AuNP/Pb<sub>0.5</sub>Sn<sub>0.5</sub>I<sub>2</sub>, and CsPb<sub>0.5</sub>Sn<sub>0.5</sub>I<sub>3</sub> films.

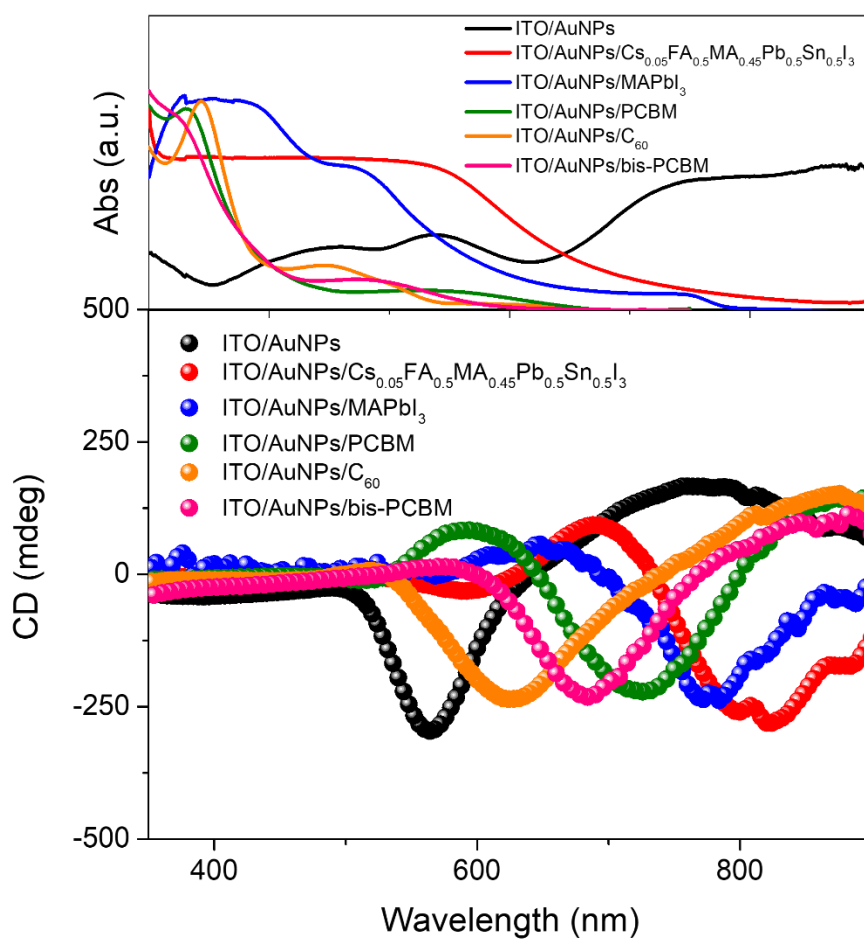

**Figure S5.** CD spectra (bottom) of AuNPs with various surrounding media deposited on ITO/AuNP substrate and their absorbance (top).

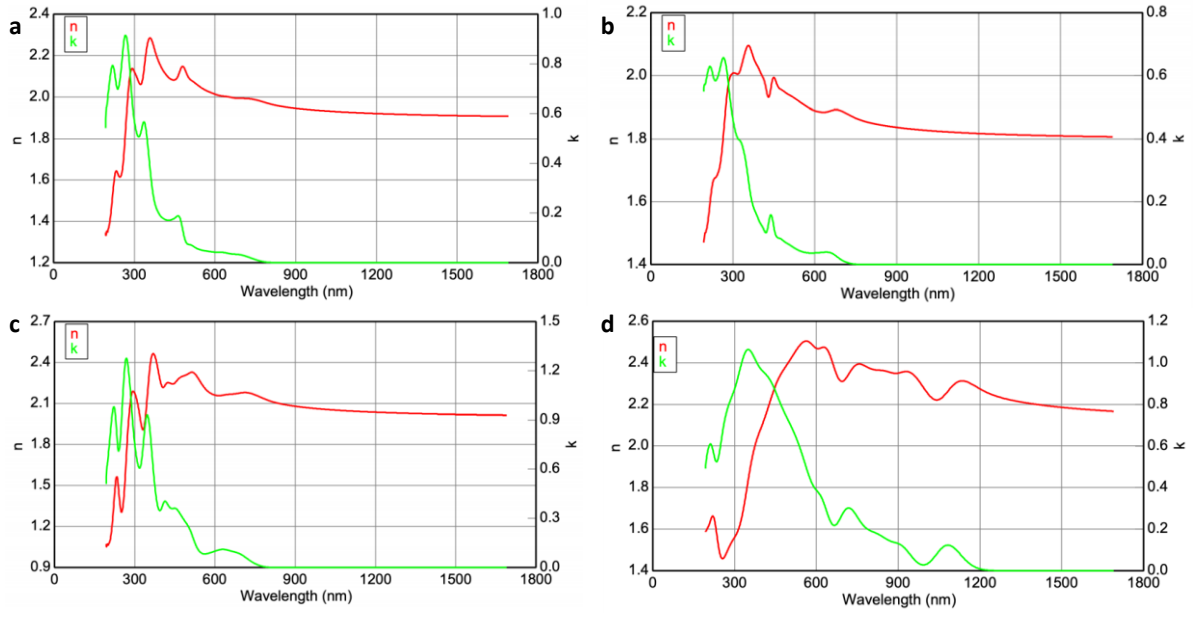

**Figure S6.**  $n$ ,  $k$  for various surrounding media. (a) PCBM, (b) bis-PCBM, (c)  $C_{60}$ , and (d)  $CS_{0.05}FA_{0.5}MA_{0.45}Pb_{0.5}Sn_{0.5}I_3$  films on ITO.

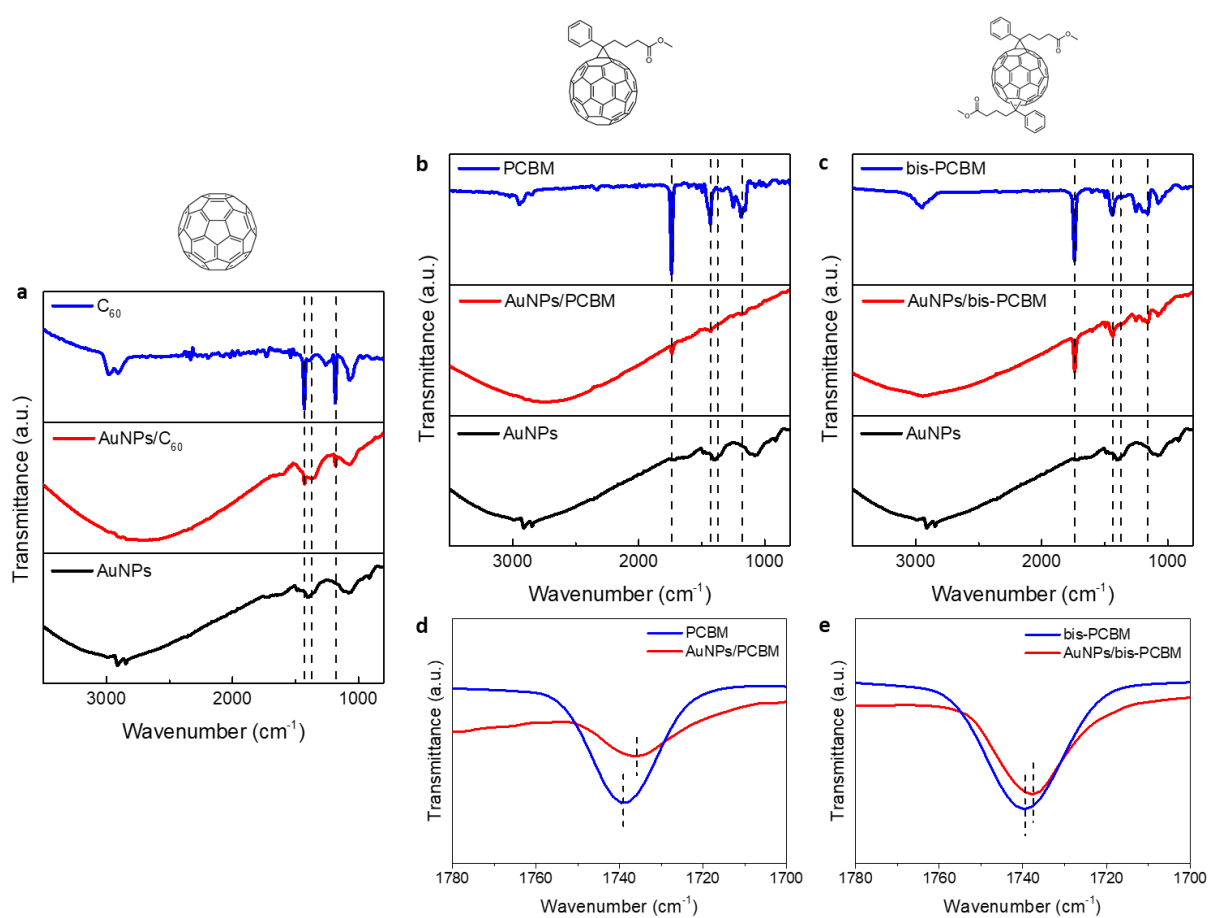

**Figure S7.** FT-IR spectroscopic analysis of (a) C<sub>60</sub>, (b) PCBM, and (c) bis-PCBM deposited on ITO/AuNPs substrate. FT-IR spectra of regions specified for the carbonyl vibrational peak for (d) PCBM and (e) bis-PCBM.

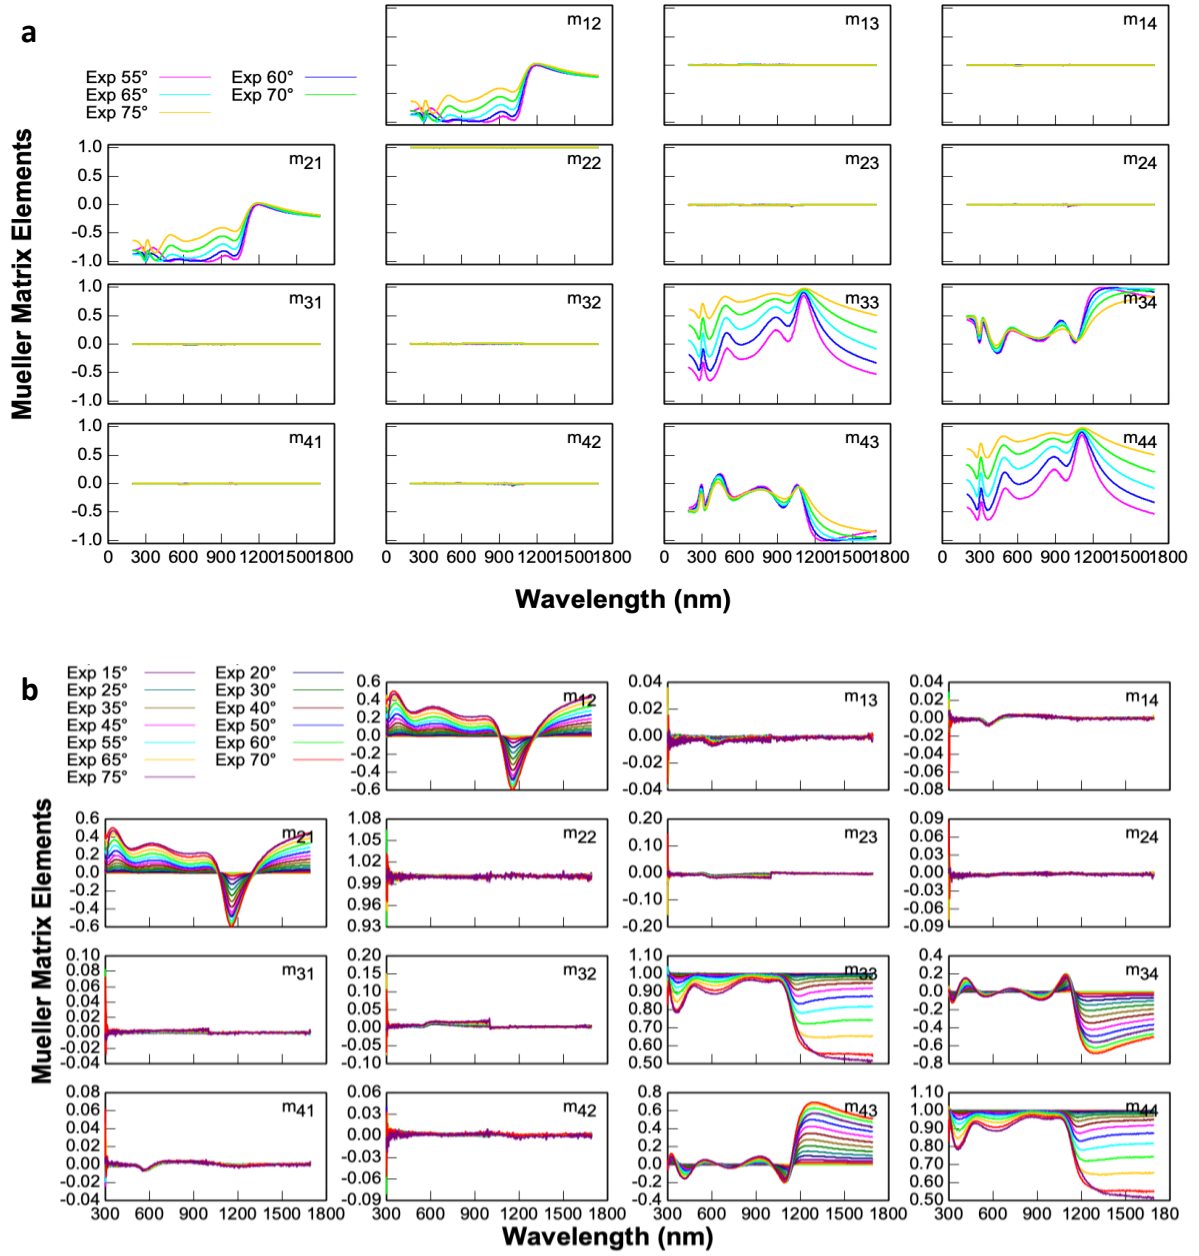

**Figure S8.** MMSE data recorded in (a) reflection and (b) transmission modes for ITO/AuNP film with various incident angles.

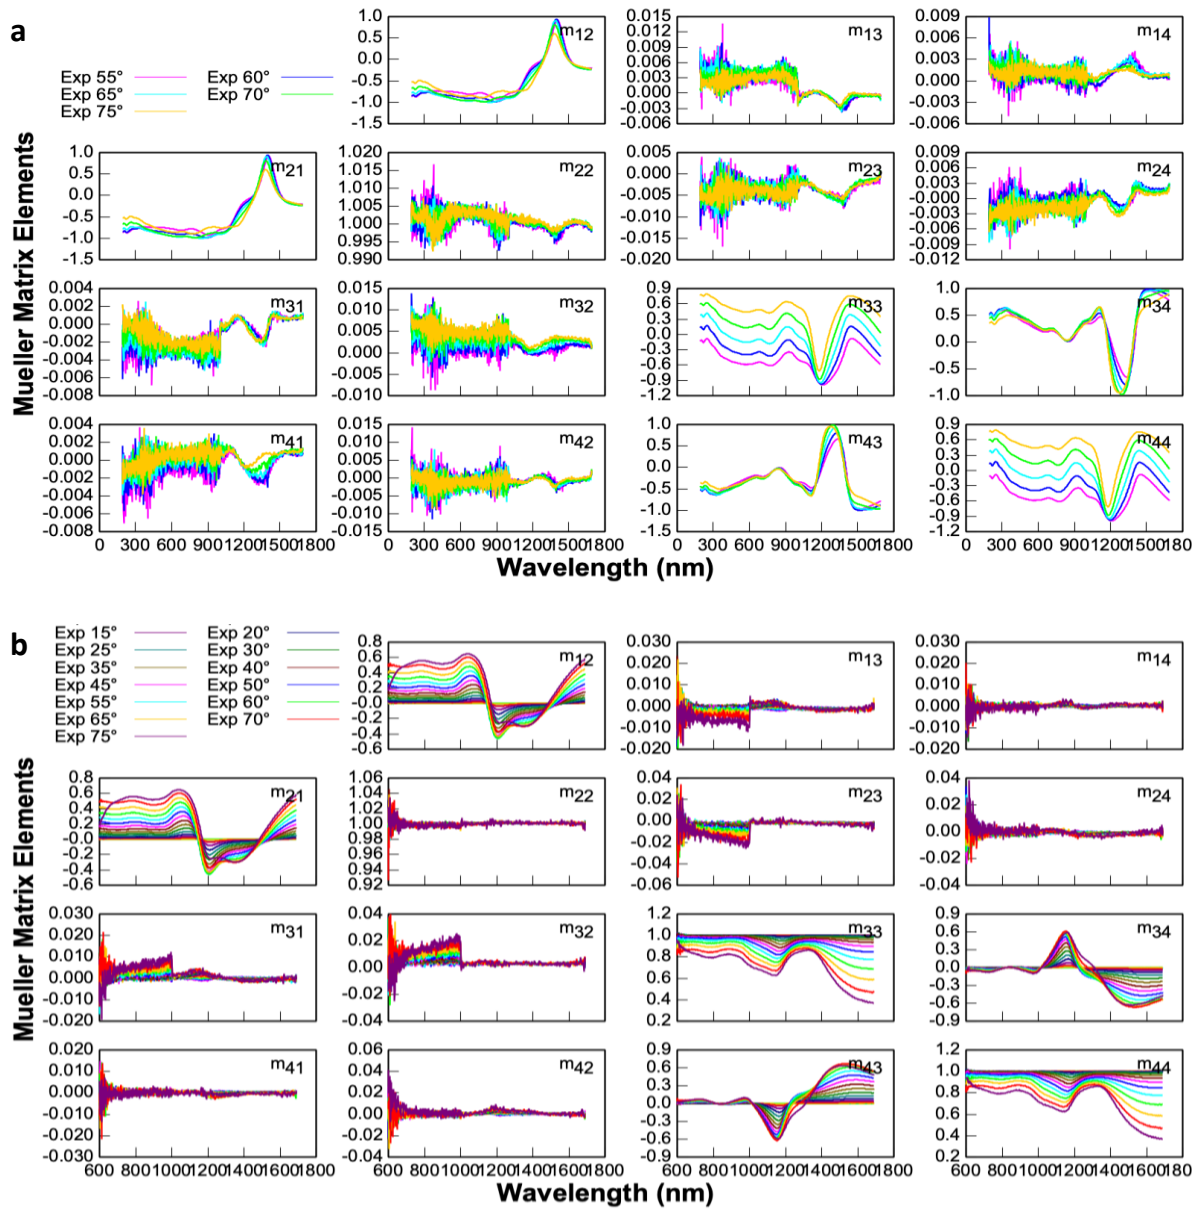

**Figure S9.** MMSE data recorded in (a) reflection and (b) transmission modes for ITO/Cs<sub>0.05</sub>FA<sub>0.5</sub>MA<sub>0.45</sub>Pb<sub>0.5</sub>Sn<sub>0.5</sub>I<sub>3</sub> film with various incident angles.

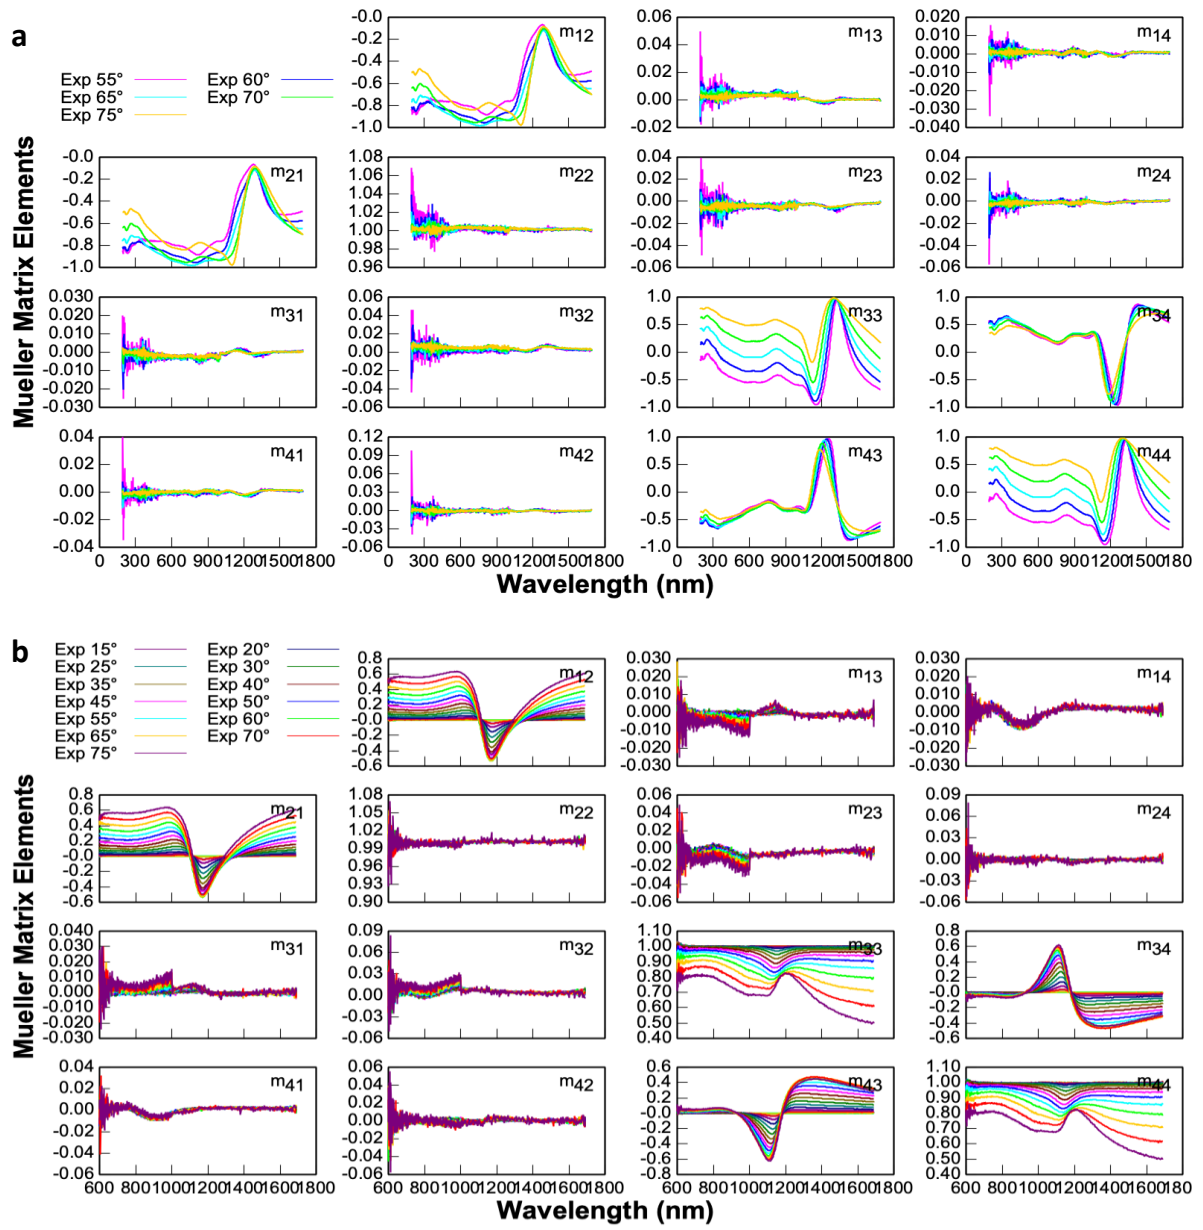

**Figure S10.** MMSE data recorded in (a) reflection and (b) transmission modes for ITO/AuNPs/Cs<sub>0.05</sub>FA<sub>0.5</sub>MA<sub>0.45</sub>Pb<sub>0.5</sub>Sn<sub>0.5</sub>I<sub>3</sub> film with various incident angles.

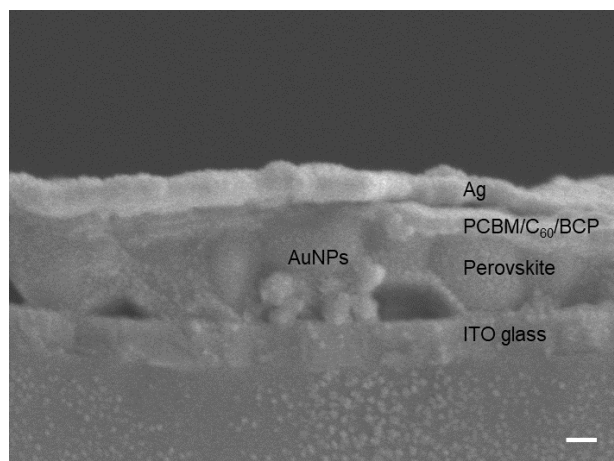

**Figure S11.** Cross-sectional SEM image of the whole device. Inset scale bar indicates 100 nm.

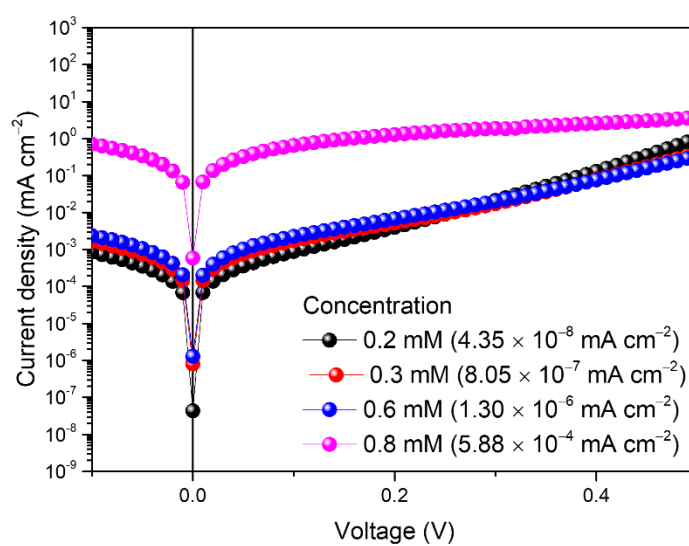

**Figure S12.** Dark currents in CPL detectors with various gold precursor concentrations. The exact values of dark current densities at 0 V depending on the concentrations of gold precursor were indicated in the figure.

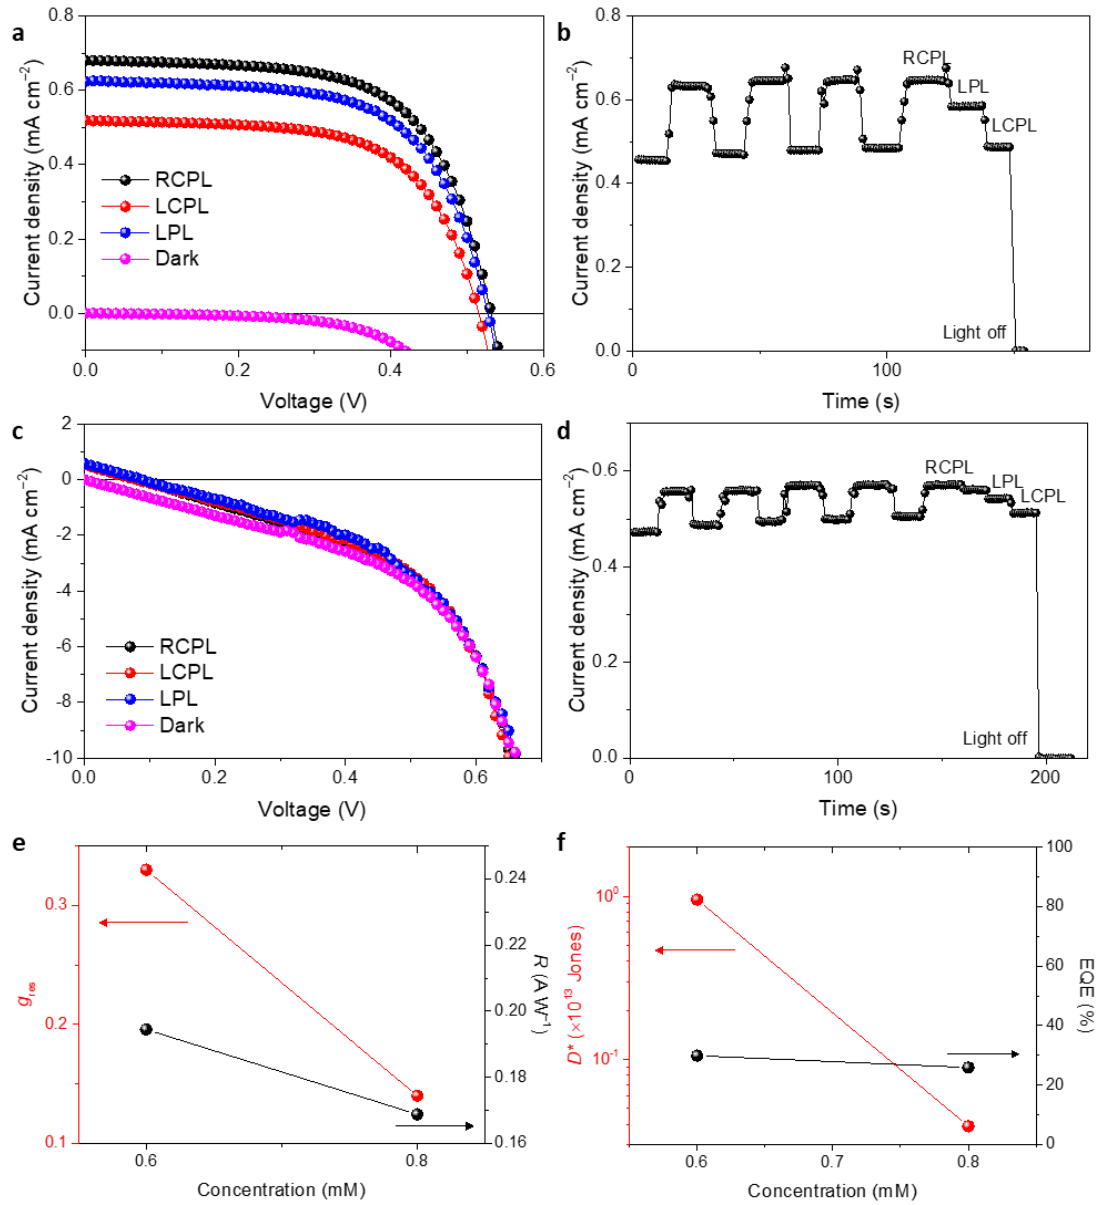

**Figure S13.** (a)  $J$ - $V$  characteristics and (b) the corresponding  $J$ - $t$  curve of CPL detectors with 0.6 mM gold precursor concentration under CPL illumination. (c)  $J$ - $V$  characteristics and (d) the corresponding  $J$ - $t$  curve of CPL detectors with 0.8 mM gold precursor concentration under CPL illumination. Gold precursor concentration dependent (e)  $g_{\text{res}}$  (left axis) and  $R$  (right axis), (f)  $D^*$  (left axis) and EQE (right axis) of CPL detectors.

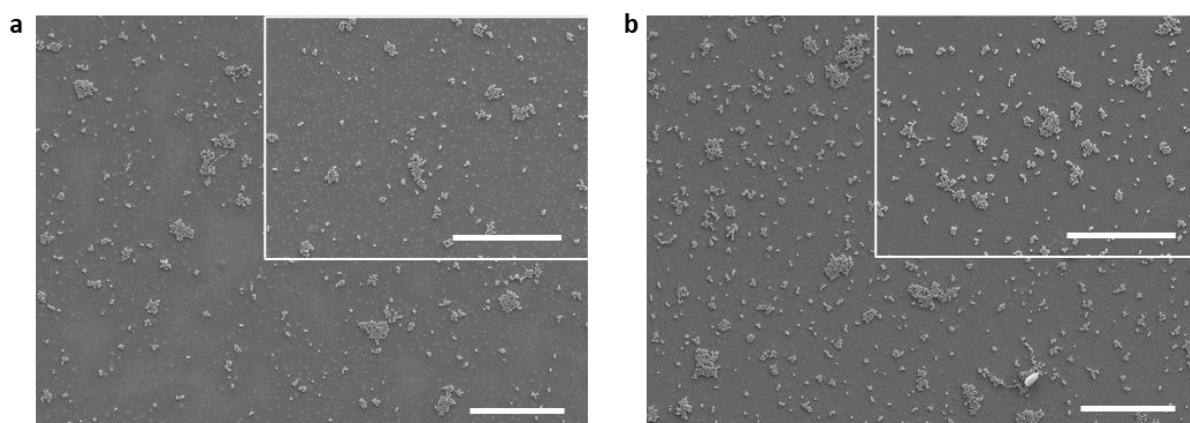

**Figure S14.** Surface SEM images of ITO/AuNPs prepared with different gold precursor concentrations: (a) 0.6 mM or (b) 0.8 mM. SEM images in the inset of each micrograph show the higher magnitude SEM images. Scale bars in all SEM images indicate 10  $\mu\text{m}$ .

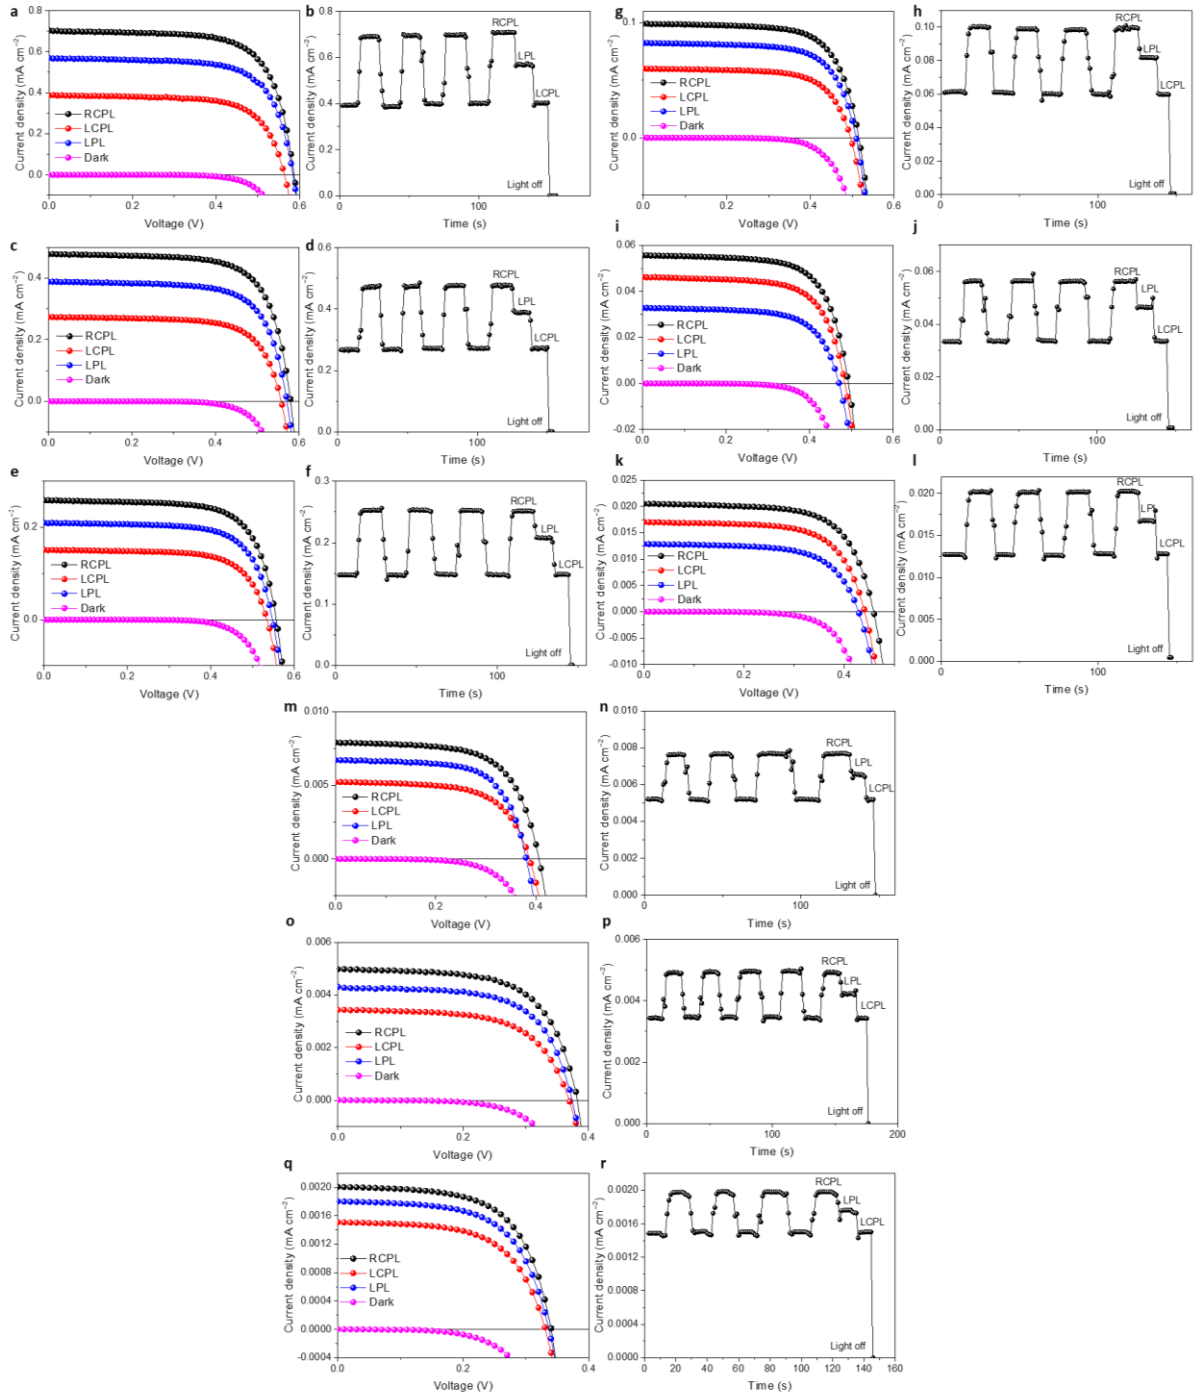

**Figure S15.** Light intensity dependent device performance.  $J$ - $V$  characteristics and the corresponding  $J$ - $t$  curve of CPL detectors with various light intensities under 808 nm CPL illumination. (a, b) 3.5  $\text{mW cm}^{-2}$ , (c, d) 2.2  $\text{mW cm}^{-2}$ , (e, f) 1.2  $\text{mW cm}^{-2}$ , (g, h) 0.5  $\text{mW cm}^{-2}$ , (i, j) 0.23  $\text{mW cm}^{-2}$ , (k, l) 70  $\mu\text{W cm}^{-2}$ , (m, n) 25  $\mu\text{W cm}^{-2}$ , (o, p) 16  $\mu\text{W cm}^{-2}$ , and (q, r) 5  $\mu\text{W cm}^{-2}$ .

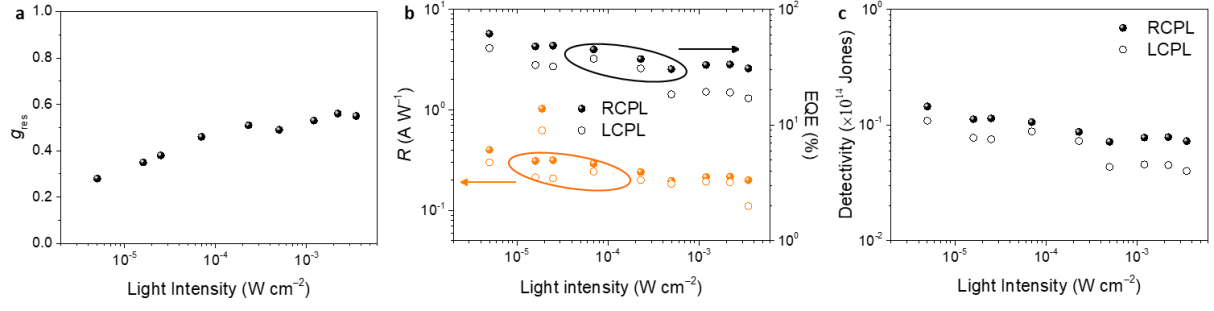

**Figure S16.** Light intensity dependent device performance. (a) Light intensity dependent  $g_{\text{res}}$ . (b) Light intensity dependent  $R$  (left axis) and EQE (right axis). (c) Light intensity dependent  $D^*$ .

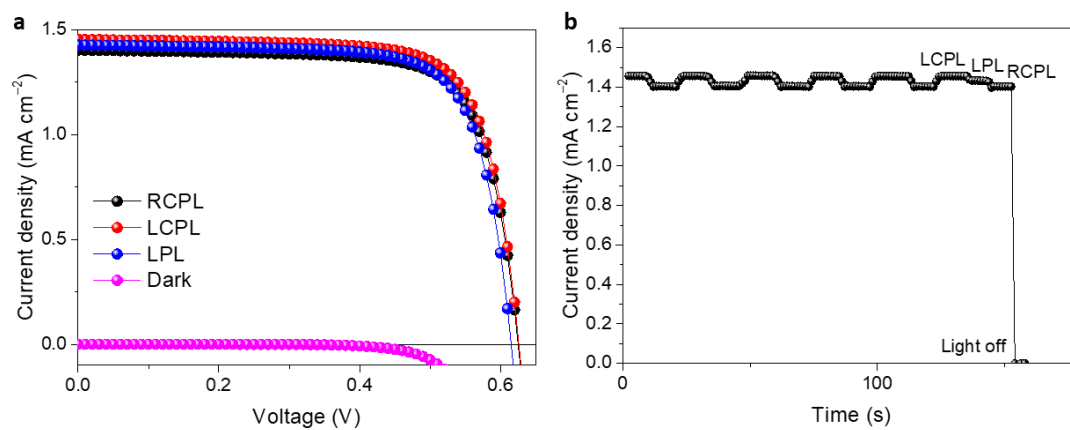

**Figure S17.** Device performance of CPL detector under 650 nm CPL illumination. (a)  $J$ - $V$  characteristics and (b) the corresponding  $J$ - $t$  curve of the CPL detector.

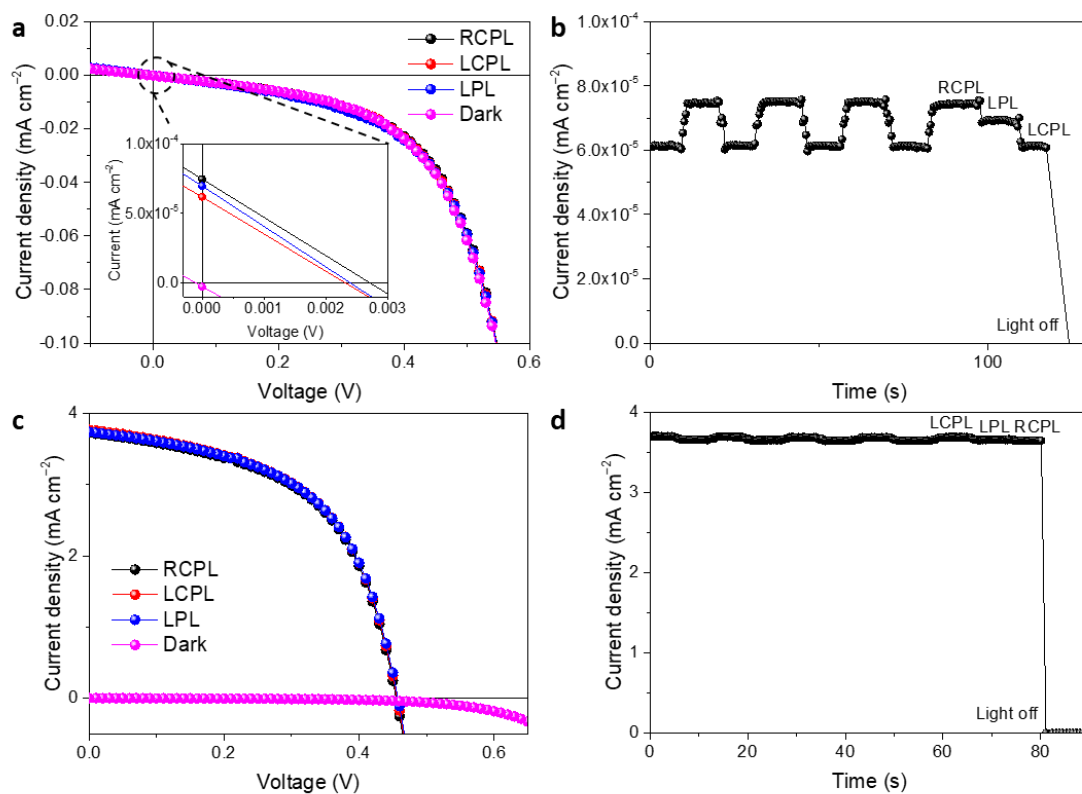

**Figure S18.** Device performance of CPL detector using MAPbI<sub>3</sub> as an active layer under 808 nm or 650 nm CPL illumination. (a)  $J$ - $V$  characteristics and (b) the corresponding  $J$ - $t$  curve of the CPL detector under 808 nm CPL illumination. (c)  $J$ - $V$  characteristics and (d) the corresponding  $J$ - $t$  curve of the CPL detector under 650 nm CPL illumination.

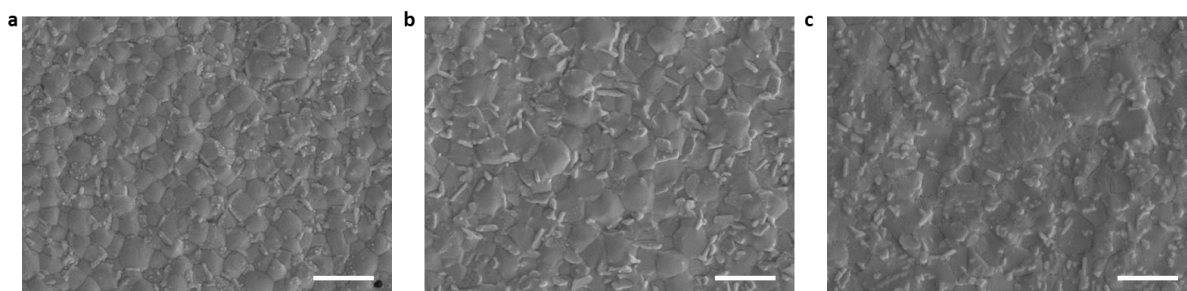

**Figure S19.** Surface SEM images of perovskite deposited on ITO/AuNP substrate with various perovskite thicknesses: (a) 250 nm, (b), 400 nm, and (c) 800 nm. Scale bars in SEM images indicate 1  $\mu\text{m}$ .

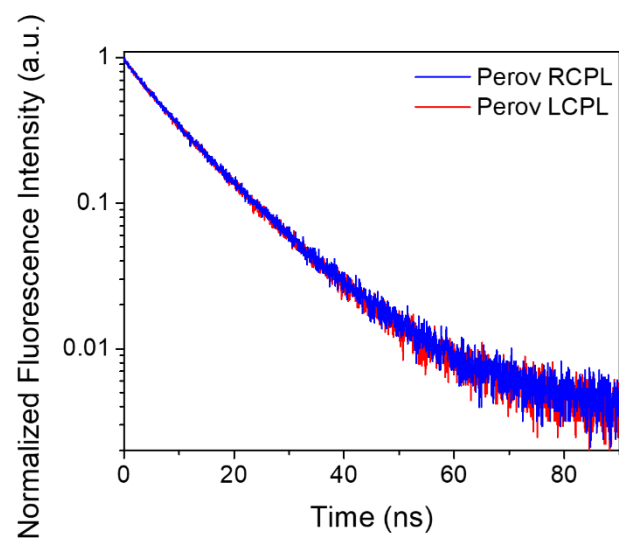

**Figure S20.** Normalized fluorescence decay profiles for MAPbI<sub>3</sub> film without AuNPs under 633 nm CPL excitation.

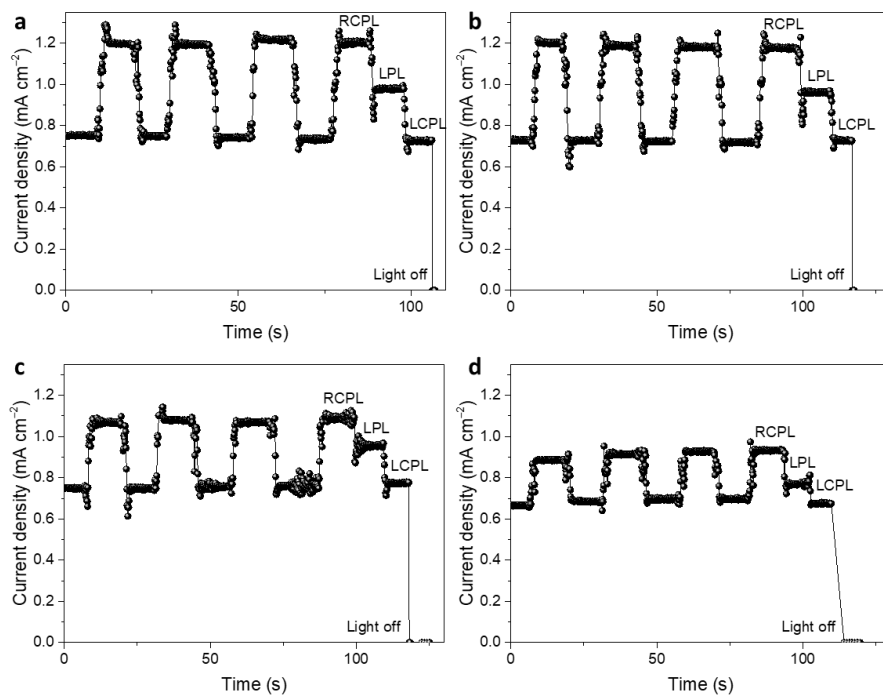

**Figure S21.**  $J$ - $t$  curves of flexible CPL detectors under 808 nm CPL illumination at various bending radii: (a) 3 cm, (b) 2.5 cm, (c) 2 cm, (d) 1.5 cm.

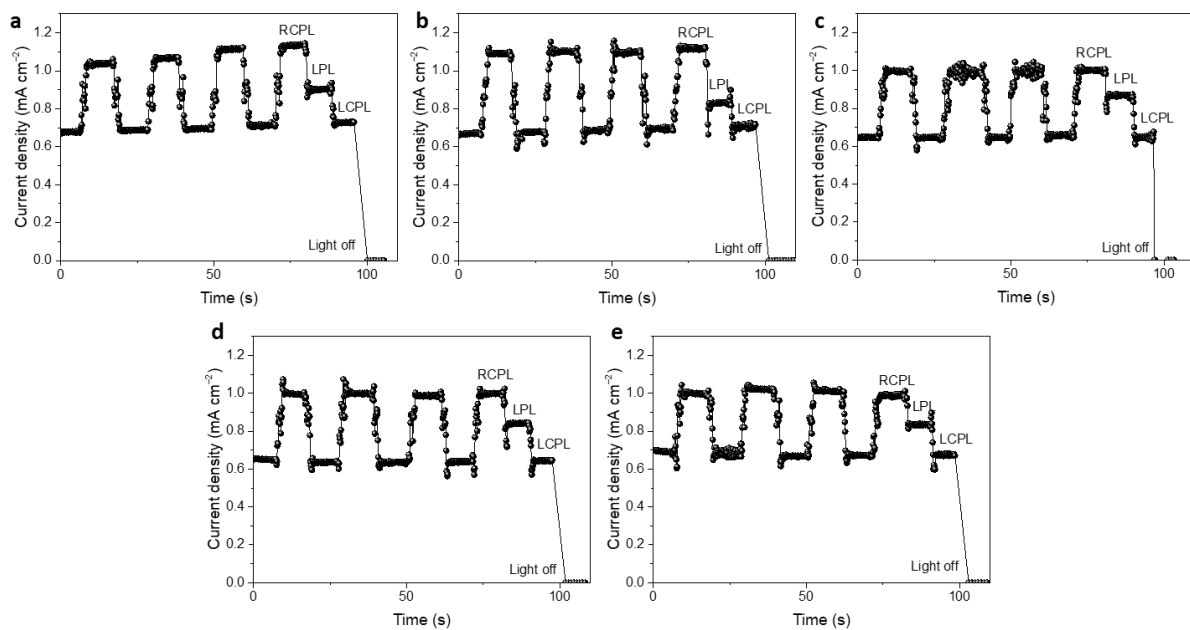

**Figure S22.**  $J$ - $t$  curves of flexible CPL detectors under 808 nm CPL illumination after following repetitive bending tests with a fixed bending radius of 2.5 cm: (a) 200 cycles, (b) 400 cycles, (c) 600 cycles, (d) 800 cycles, (e) 1000 cycles.
